# Supplementary material for: Smoking increases risks of all-cause and breast cancer specific mortality in breast cancer individuals: a dose-response meta-analysis of prospective cohort studies involving 39725 breast cancer cases
Source: PubMed Central journal article supplement (PMC5347758; doi:10.18632/oncotarget.13366), 2016-11-15
Supplement: oncotarget-07-83134-s001.pdf [file oncotarget-07-83134-s001.pdf]

# Smoking increases risks of all-cause and breast cancer specific mortality in breast cancer individuals: a dose-response meta-analysis of prospective cohort studies involving 39725 breast cancer cases

## Supplementary Materials

### Supplementary List S1: Search Strategy

#### Pubmed

#1: (((((((Smoke [Title/Abstract]) OR Smoking [Title/Abstract]) OR Tobacco [Title/Abstract]) OR Cigarette [Title/Abstract]) OR Cigarettes [Title/Abstract]) OR Nicotine [Title/Abstract]) OR Baccy [Title/Abstract])  
 #2: (Breast [Title/Abstract]) OR Mammary [Title/Abstract])

#3: (((Cancer [Title/Abstract]) OR Neoplasm [Title/Abstract]) OR Tumors [Title/Abstract]) OR Malignancy [Title/Abstract]) OR Carcinoma [Title/Abstract]  
 #4: #2 AND #3  
 #5: (Death [Title/Abstract]) OR Mortality [Title/Abstract]  
 #6: #1 AND #4 AND #5  
 #7: (review[Publication Type]) OR letter[Publication Type]  
 #8: #6 NOT #7

PubMed Search: (((((((Smoke[Title/Abstract]) OR Smoking[Title/Abstract]) OR Tobacco[Title/Abstract]) OR Cigarette[Title/Abstract]) OR Cigarettes[Title/Abstract]) OR Nicotine[Title/Abstract]) OR Baccy[Title/Abstract])

Search results: 1 to 20 of 598

- Risk of Adverse Health and Social Outcomes Up to 50 Years After Wilms Tumor: The British Childhood Cancer Survivor Study.**  
 Wong KF, Reulen RC, Winter DL, Guha J, Fidler MM, Kelly J, Lancashire ER, Pritchard-Jones K, Jenkinson HC, Sugden E, Levitt G, Frobisher C, Hawkins MM.  
 J Clin Oncol. 2016 Mar 28. pii: JCO644344. [Epub ahead of print]  
 PMID: 27022116
- Cardiovascular Disease Risk Profiles in Survivors of Adolescent and Young Adult (AYA) Cancer: The Kaiser Permanente AYA Cancer Survivors Study.**  
 Chao C, Xu L, Bhatia S, Cooper R, Brar S, Wong FL, Armenian SH.  
 J Clin Oncol. 2016 Mar 7. pii: JCO655845. [Epub ahead of print]

| Search | Add to builder | Query                                                                                                                                                                                                                                                                                                                                                                                                                                                                                                                                                         | Items found | Time     |
|--------|----------------|---------------------------------------------------------------------------------------------------------------------------------------------------------------------------------------------------------------------------------------------------------------------------------------------------------------------------------------------------------------------------------------------------------------------------------------------------------------------------------------------------------------------------------------------------------------|-------------|----------|
| #8     | Add            | Search (((((((Smoke[Title/Abstract]) OR Smoking[Title/Abstract]) OR Tobacco[Title/Abstract]) OR Cigarette[Title/Abstract]) OR Cigarettes[Title/Abstract]) OR Nicotine[Title/Abstract]) OR Baccy [Title/Abstract]) AND (((Breast[Title/Abstract]) OR Mammary[Title/Abstract]) AND (((Cancer [Title/Abstract]) OR Neoplasm[Title/Abstract]) OR Tumors[Title/Abstract]) OR Malignancy [Title/Abstract]) OR Carcinoma[Title/Abstract])) AND ((Death[Title/Abstract]) OR Mortality [Title/Abstract])) NOT ((review[Publication Type]) OR letter[Publication Type]) | 598         | 12:14:40 |
| #7     | Add            | Search (review[Publication Type]) OR letter[Publication Type]                                                                                                                                                                                                                                                                                                                                                                                                                                                                                                 | 2299668     | 12:11:52 |
| #6     | Add            | Search (((((((Smoke[Title/Abstract]) OR Smoking[Title/Abstract]) OR Tobacco[Title/Abstract]) OR Cigarette[Title/Abstract]) OR Cigarettes[Title/Abstract]) OR Nicotine[Title/Abstract]) OR Baccy [Title/Abstract]) AND (((Breast[Title/Abstract]) OR Mammary[Title/Abstract]) AND (((Cancer [Title/Abstract]) OR Neoplasm[Title/Abstract]) OR Tumors[Title/Abstract]) OR Malignancy [Title/Abstract]) OR Carcinoma[Title/Abstract])) AND ((Death[Title/Abstract]) OR Mortality [Title/Abstract]))                                                              | 750         | 12:10:36 |
| #5     | Add            | Search (Death[Title/Abstract]) OR Mortality[Title/Abstract]                                                                                                                                                                                                                                                                                                                                                                                                                                                                                                   | 990021      | 12:10:04 |
| #4     | Add            | Search (((Breast[Title/Abstract]) OR Mammary[Title/Abstract]) AND (((Cancer[Title/Abstract]) OR Neoplasm[Title/Abstract]) OR Tumors[Title/Abstract]) OR Malignancy[Title/Abstract]) OR Carcinoma [Title/Abstract])                                                                                                                                                                                                                                                                                                                                            | 273453      | 12:08:41 |
| #3     | Add            | Search (((Cancer[Title/Abstract]) OR Neoplasm[Title/Abstract]) OR Tumors[Title/Abstract]) OR Malignancy[Title/Abstract]) OR Carcinoma[Title/Abstract]                                                                                                                                                                                                                                                                                                                                                                                                         | 1884235     | 12:08:10 |
| #2     | Add            | Search (Breast[Title/Abstract]) OR Mammary[Title/Abstract]                                                                                                                                                                                                                                                                                                                                                                                                                                                                                                    | 375867      | 12:05:01 |
| #1     | Add            | Search (((((((Smoke[Title/Abstract]) OR Smoking[Title/Abstract]) OR Tobacco[Title/Abstract]) OR Cigarette[Title/Abstract]) OR Cigarettes[Title/Abstract]) OR Nicotine[Title/Abstract]) OR Baccy [Title/Abstract])                                                                                                                                                                                                                                                                                                                                             | 256856      | 11:59:05 |

## EMBASE

#1: 'death':ab,ti AND ([article]/lim OR [article in press]/lim OR [conference abstract]/lim OR [conference paper]/lim) AND [embase]/lim

#2: 'mortality':ab,ti AND ([article]/lim OR [article in press]/lim OR [conference abstract]/lim OR [conference paper]/lim) AND [embase]/lim

#3: #1 OR #2

#4: 'smoke':ab,ti AND ([article]/lim OR [article in press]/lim OR [conference abstract]/lim OR [conference paper]/lim) AND [embase]/lim

#5: 'smoking':ab,ti AND ([article]/lim OR [article in press]/lim OR [conference abstract]/lim OR [conference paper]/lim) AND [embase]/lim

#6: 'tobacco':ab,ti AND ([article]/lim OR [article in press]/lim OR [conference abstract]/lim OR [conference paper]/lim) AND [embase]/lim

#7: 'cigarette':ab,ti AND ([article]/lim OR [article in press]/lim OR [conference abstract]/lim OR [conference paper]/lim) AND [embase]/lim

#8: 'Nicotine':ab,ti AND ([article]/lim OR [article in press]/lim OR [conference abstract]/lim OR [conference paper]/lim) AND [embase]/lim

#9: #4 OR #5 OR #6 OR #7 OR #8

#10: 'breast':ab,ti AND ([article]/lim OR [article in press]/lim OR [conference abstract]/lim OR [conference paper]/lim) AND [embase]/lim

#11: 'mammary':ab,ti AND ([article]/lim OR [article in press]/lim OR [conference abstract]/lim OR [conference paper]/lim) AND [embase]/lim

#12: #10 AND #11

#13: 'cancer':ab,ti AND ([article]/lim OR [article in press]/lim OR [conference abstract]/lim OR [conference paper]/lim) AND [embase]/lim

#14: 'neoplasm':ab,ti AND ([article]/lim OR [article in press]/lim OR [conference abstract]/lim OR [conference paper]/lim) AND [embase]/lim

#15: 'tumors':ab,ti AND ([article]/lim OR [article in press]/lim OR [conference abstract]/lim OR [conference paper]/lim) AND [embase]/lim

#16: 'malignancy':ab,ti AND ([article]/lim OR [article in press]/lim OR [conference abstract]/lim OR [conference paper]/lim) AND [embase]/lim

#17: 'carcinoma':ab,ti AND ([article]/lim OR [article in press]/lim OR [conference abstract]/lim OR [conference paper]/lim) AND [embase]/lim

#18: #13 OR #14 OR #15 OR #16 OR #17

#19: #12 AND #18

#20: #3 AND #9 AND #19.

| #   | Search Query                                                                                                                             | Results   |
|-----|------------------------------------------------------------------------------------------------------------------------------------------|-----------|
| #20 | #3 AND #9 AND #19                                                                                                                        | 747       |
| #19 | #12 AND #18                                                                                                                              | 265,690   |
| #18 | #13 OR #14 OR #15 OR #16 OR #17                                                                                                          | 438,293   |
| #17 | 'carcinoma':ab,ti AND ([article]/lim OR [article in press]/lim OR [conference abstract]/lim OR [conference paper]/lim) AND [embase]/lim  | 114,143   |
| #16 | 'malignancy':ab,ti AND ([article]/lim OR [article in press]/lim OR [conference abstract]/lim OR [conference paper]/lim) AND [embase]/lim | 443,203   |
| #15 | 'tumors':ab,ti AND ([article]/lim OR [article in press]/lim OR [conference abstract]/lim OR [conference paper]/lim) AND [embase]/lim     | 42,646    |
| #14 | 'neoplasm':ab,ti AND ([article]/lim OR [article in press]/lim OR [conference abstract]/lim OR [conference paper]/lim) AND [embase]/lim   | 1,134,471 |
| #13 | 'cancer':ab,ti AND ([article]/lim OR [article in press]/lim OR [conference abstract]/lim OR [conference paper]/lim) AND [embase]/lim     | 333,761   |
| #12 | #10 OR #11                                                                                                                               | 51,069    |
| #11 | 'mammary':ab,ti AND ([article]/lim OR [article in press]/lim OR [conference abstract]/lim OR [conference paper]/lim) AND [embase]/lim    | 302,560   |
| #10 | 'breast':ab,ti AND ([article]/lim OR [article in press]/lim OR [conference abstract]/lim OR [conference paper]/lim) AND [embase]/lim     | 225,864   |
| #9  | #4 OR #5 OR #6 OR #7 OR #8                                                                                                               | 26,807    |
| #8  | 'nicotine':ab,ti AND ([article]/lim OR [article in press]/lim OR [conference abstract]/lim OR [conference paper]/lim) AND [embase]/lim   | 40,541    |
| #7  | 'cigarette':ab,ti AND ([article]/lim OR [article in press]/lim OR [conference abstract]/lim OR [conference paper]/lim) AND [embase]/lim  | 50,291    |
| #6  | 'tobacco':ab,ti AND ([article]/lim OR [article in press]/lim OR [conference abstract]/lim OR [conference paper]/lim) AND [embase]/lim    | 168,776   |
| #5  | 'smoking':ab,ti AND ([article]/lim OR [article in press]/lim OR [conference abstract]/lim OR [conference paper]/lim) AND [embase]/lim    | 34,526    |
| #4  | 'smoke':ab,ti AND ([article]/lim OR [article in press]/lim OR [conference abstract]/lim OR [conference paper]/lim) AND [embase]/lim      |           |

| Results                                                                                   | View                                                                                                                                                                                                                                                                                                                                                                                                                         | Print | Export | Email | Order | Add to Clipboard |
|-------------------------------------------------------------------------------------------|------------------------------------------------------------------------------------------------------------------------------------------------------------------------------------------------------------------------------------------------------------------------------------------------------------------------------------------------------------------------------------------------------------------------------|-------|--------|-------|-------|------------------|
| 747 results for search #20   Show all abstracts                                           |                                                                                                                                                                                                                                                                                                                                                                                                                              |       |        |       |       |                  |
| 1 -- 25                                                                                   |                                                                                                                                                                                                                                                                                                                                                                                                                              |       |        |       |       |                  |
| Select number of items Selected: 0 (clear) Sort by: Relevance Publication Year Entry Date |                                                                                                                                                                                                                                                                                                                                                                                                                              |       |        |       |       |                  |
| 1                                                                                         | <p>A pooled analysis of post-diagnosis lifestyle factors in association with late estrogen-receptor-positive breast cancer prognosis<br/>           Nechuta S, Chen W-Y, Cai H, Poole E M, Kwan M-L, Flatt S W, Patterson R E, Pierce J P, Caan B J, Ou Shu X.<br/> <i>International Journal of Cancer</i> 2016 138:9 (2088-2097)</p> <p>Embase Abstract Index Terms View Full Text PDF Librarian</p>                        |       |        |       |       |                  |
| 2                                                                                         | <p>Active smoking and breast cancer risk in Danish nurse cohort study<br/>           Andersen Z, Andersen K K, Gren R, Brauner E, Lyngge E.<br/> <i>European Journal of Cancer</i> 2016 57 SUPPL 2 (135-)</p> <p>Embase Abstract Index Terms View Full Text PDF Librarian</p>                                                                                                                                                |       |        |       |       |                  |
| 3                                                                                         | <p>A Comprehensive Multistate Model Analyzing Associations of Various Risk Factors with the Course of Breast Cancer in a Population-Based Cohort of Breast Cancer Cases<br/>           Esalenberg C, Schroeder J, Oh N, Hertz J, Seibold P, Rudolph A, Chang-Claude J, Flesch-Janys D.<br/> <i>American Journal of Epidemiology</i> 2016 183:4 (325-334)</p> <p>Embase Abstract Index Terms View Full Text PDF Librarian</p> |       |        |       |       |                  |

Supplementary Table S1: Exclusion reasons. See Supplementary\_Table\_S1

## Supplementary Table S2: Results of quality assessment

| Source (reference) | Selection <sup>1</sup>                    |                                      |                             |                                         | Comparability <sup>2</sup>                   |   | Outcome <sup>3</sup>    |                                | Total Score <sup>4</sup> |                                   |
|--------------------|-------------------------------------------|--------------------------------------|-----------------------------|-----------------------------------------|----------------------------------------------|---|-------------------------|--------------------------------|--------------------------|-----------------------------------|
|                    | Representativeness of exposed cohort<br>★ | Selection of non-exposed cohort<br>★ | Exposure ascertainment<br>★ | No death when investigation begins<br>★ | Comparable on confounder <sup>5</sup><br>★ ★ |   | Outcome Assessment<br>★ | Adequate follow-up (≥10y)<br>★ |                          | Loss to follow-up rate(≤20%)<br>★ |
| Passarelli, et al. | ★                                         | ★                                    | ★                           | ★                                       | ★                                            |   | ★                       | ★                              | 7                        |                                   |
| Nechuta, et al.    |                                           | ★                                    | ★                           | ★                                       | ★                                            | ★ | ★                       | ★                              | 8                        |                                   |
| Kakugawa, et al.   | ★                                         | ★                                    | ★                           | ★                                       | ★                                            | ★ | ★                       | ★                              | ★                        | 9                                 |
| Izano, et al.      |                                           | ★                                    | ★                           | ★                                       | ★                                            | ★ | ★                       | ★                              | ★                        | 8                                 |
| Boone, et al.      | ★                                         | ★                                    |                             | ★                                       | ★                                            | ★ | ★                       | ★                              | ★                        | 7                                 |
| Seibold, et al.    | ★                                         | ★                                    | ★                           | ★                                       | ★                                            | ★ | ★                       | ★                              | ★                        | 9                                 |
| Pierce, et al.     | ★                                         | ★                                    | ★                           | ★                                       | ★                                            |   | ★                       | ★                              | 6                        |                                   |
| Bérubé, et al.     | ★                                         | ★                                    | ★                           | ★                                       | ★                                            | ★ | ★                       | ★                              | 8                        |                                   |
| Saquib, et al.     |                                           | ★                                    | ★                           | ★                                       | ★                                            | ★ | ★                       | ★                              | ★                        | 8                                 |
| Dal Maso, et al.   |                                           | ★                                    | ★                           | ★                                       | ★                                            |   | ★                       | ★                              | 6                        |                                   |
| Sagiv, et al.      | ★                                         | ★                                    | ★                           | ★                                       | ★                                            |   | ★                       | ★                              | 7                        |                                   |

<sup>1</sup>“Selection” part includes representativeness of cases, selection of controls, exposure ascertainment, and no death when investigation begin.

<sup>2</sup>“Comparability” part includes comparable on confounders.

<sup>3</sup>“Outcome” part includes outcome assessment, adequate follow-up, and loss to follow-up rate.

<sup>4</sup>The total score is equal to the total number of stars.

<sup>5</sup>If the studies adjusted for two individual factors among age, therapy, stage, it is award a star. If the studies adjusted for two lifestyle factors among body mass index, physical activity, and alcohol consumption, it is award another star.

## Supplementary Table S3: Sensitivity analyses regarding smoking and mortality in breast individuals. See Supplementary\_Table\_S3
